# Supplementary material for: TERT promoter mutations contribute to IDH mutations in predicting differential responses to adjuvant therapies in WHO grade II and III diffuse gliomas
Source: PubMed Central journal article supplement (PMC4694799; doi:10.18632/oncotarget.4549), 2015-07-09
Supplement: oncotarget-06-24871-s001.pdf [file oncotarget-06-24871-s001.pdf]

SUPPLEMENTARY FIGURES AND TABLES

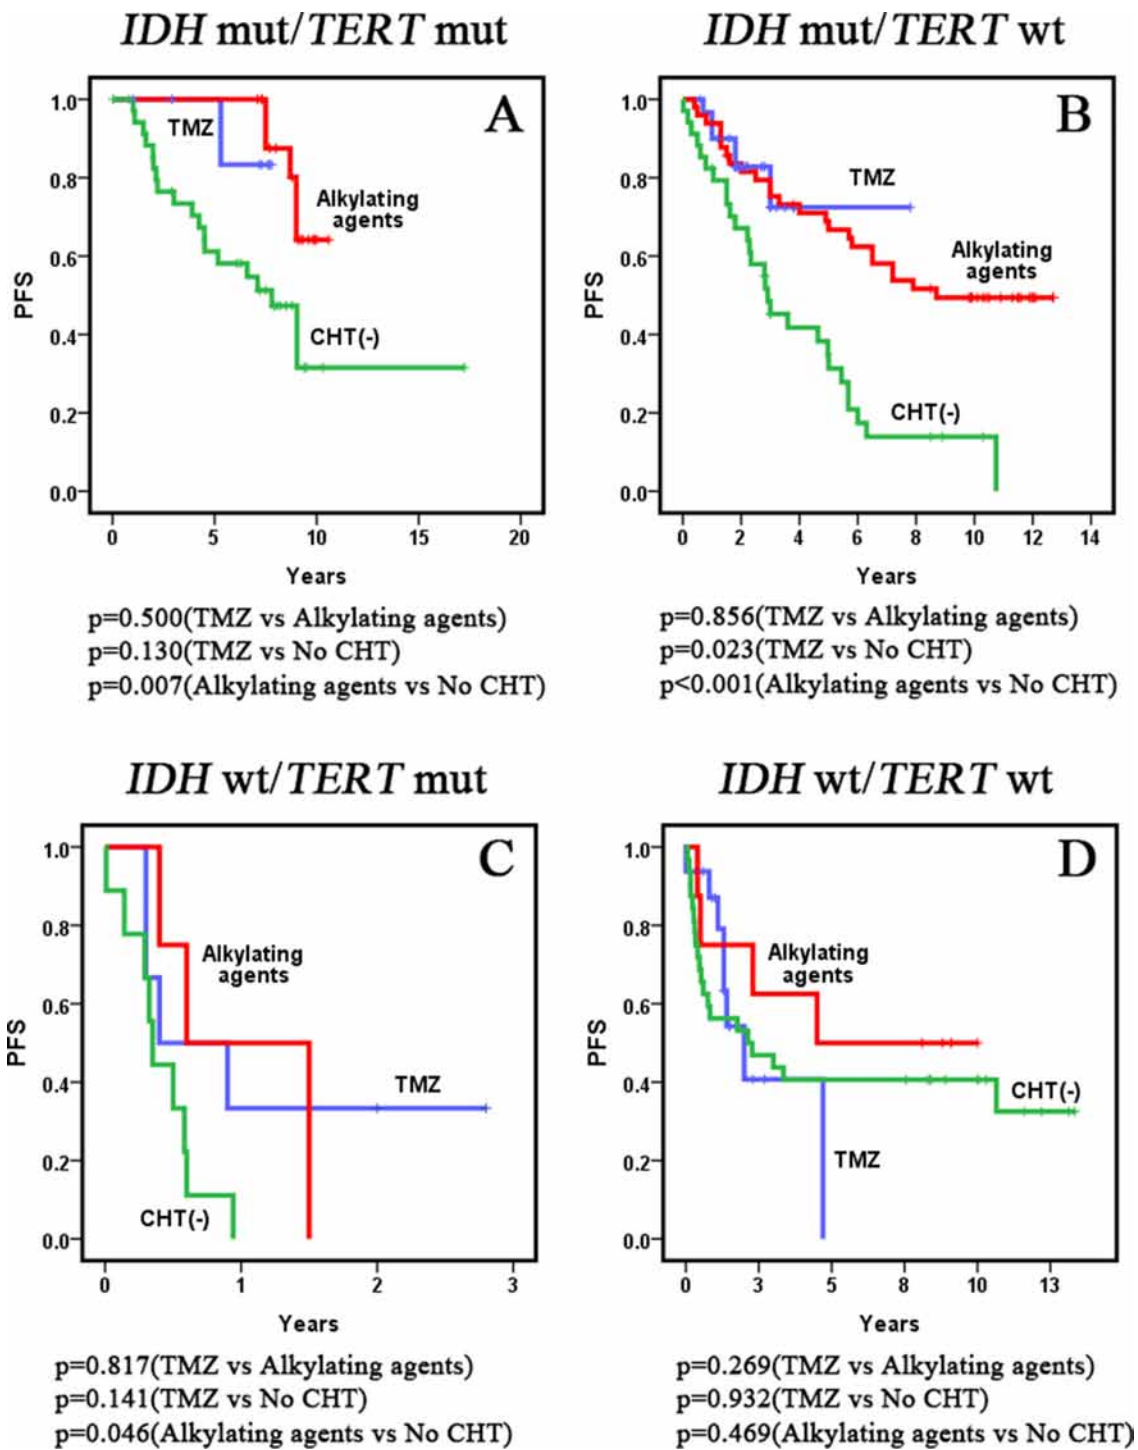

Supplementary Figure S1: Kaplan-Meier survival curves (univariate analysis) of different chemotherapy schemes for PFS in subgroups of WHO grade II and III diffuse gliomas defined by *IDH* and *TERT* promoter mutations. In *IDH* mut/*TERT* mut **A**, *IDH* mut/*TERT* wt **B**, *IDH* wt/*TERT* mut **C**, and *IDH* wt/*TERT* wt **D**, subgroups, the PFS of patients who received TMZ (blue) did not differ significantly from the PFS of those who received other alkylating agents (red).

**Supplementary Table S1. Univariate analysis of pathological factors for PFS and OS in patients with WHO grade II and III diffuse gliomas who received adjuvant therapies (Group A,  $n = 246$ ) and who did not (Group B,  $n = 49$ ) after first surgery**

| Adjuvant therapies | Molecular markers    | <i>N</i> | Median PFS (years) | <i>p</i> -value  | Median OS (years) | <i>p</i> -value  |
|--------------------|----------------------|----------|--------------------|------------------|-------------------|------------------|
| RT and/or CHT      |                      | 246      |                    |                  |                   |                  |
|                    | <i>IDH</i>           |          |                    |                  |                   |                  |
|                    | <i>IDH</i> mut       | 189      | 9.0                | <b>&lt;0.001</b> | NR                | <b>&lt;0.001</b> |
|                    | <i>IDH</i> wt        | 57       | 1.8                |                  | 2.6               |                  |
|                    | <i>TERT</i> promoter |          |                    |                  |                   |                  |
|                    | <i>TERT</i> mut      | 93       | 9.0                | 0.072            | NR                | <b>0.046</b>     |
|                    | <i>TERT</i> wt       | 153      | 5.7                |                  | 7.8               |                  |
| No RT nor CHT      |                      | 49       |                    |                  |                   |                  |
|                    | <i>IDH</i>           |          |                    |                  |                   |                  |
|                    | <i>IDH</i> mut       | 27       | 2.9                | 0.702            | 9.7               | 0.497            |
|                    | <i>IDH</i> wt        | 22       | 0.5                |                  | 0.6               |                  |
|                    | <i>TERT</i> promoter |          |                    |                  |                   |                  |
|                    | <i>TERT</i> mut      | 19       | 2.0                | 0.706            | 9.7               | 0.851            |
|                    | <i>TERT</i> wt       | 30       | 2.3                |                  | 3.6               |                  |

*p* values in bold were considered statistically significant

*IDH* mut : *IDH* mutant; *IDH* wt: *IDH* wild-type; *TERT* mut: *TERT* promoter mutant;  
*TERT* wt *TERT* promoter wild-type; RT: radiation therapy; CHT: chemotherapy;  
PFS: progression-free survival; OS: overall-survival; NR: not reached

**Supplementary Table S2. Univariate analysis of adjuvant therapies for PFS and OS in patients with *IDH* mutated WHO grade II and III diffuse gliomas ( $n = 216$ ), *IDH* wild-type lower grade gliomas ( $n = 79$ ), *TERT* promoter mutated WHO grade II and III diffuse gliomas ( $n = 112$ ) and *TERT* promoter wild-type WHO grade II and III diffuse gliomas ( $n = 183$ )**

| <i>IDH</i> or <i>TERT</i> status | Adjuvant therapies | <i>N</i> | Median PFS (years) | <i>p</i> -value  | Median OS (years) | <i>p</i> -value |
|----------------------------------|--------------------|----------|--------------------|------------------|-------------------|-----------------|
| <i>IDH</i> mut                   | RT                 | 216      |                    |                  |                   |                 |
|                                  | Yes                | 178      | 9                  | <b>&lt;0.001</b> | NR                | <b>0.004</b>    |
|                                  | No                 | 38       | 3.6                |                  | 7.8               |                 |
|                                  | CHT                |          |                    |                  |                   |                 |
|                                  | Yes                | 142      | NR                 | <b>&lt;0.001</b> | NR                | <b>0.001</b>    |
|                                  | No                 | 74       | 5                  |                  | 8.8               |                 |
| <i>IDH</i> wt                    | RT                 | 79       |                    |                  |                   |                 |
|                                  | Yes                | 53       | 1.8                | 0.774            | 2.5               | 0.844           |
|                                  | No                 | 26       | 0.6                |                  | 1.8               |                 |
|                                  | CHT                |          |                    |                  |                   |                 |
|                                  | Yes                | 38       | 2                  | 0.273            | 2.6               | 0.480           |
|                                  | No                 | 41       | 0.8                |                  | 1.8               |                 |
| <i>TERT</i> mut                  | RT                 | 112      |                    |                  |                   |                 |
|                                  | Yes                | 87       | 9                  | <b>0.016</b>     | NR                | 0.080           |
|                                  | No                 | 25       | 2.9                |                  | 9.7               |                 |
|                                  | CHT                |          |                    |                  |                   |                 |
|                                  | Yes                | 65       | NR                 | <b>0.010</b>     | NR                | 0.094           |
|                                  | No                 | 47       | 4.5                |                  | 9.7               |                 |
| <i>TERT</i> wt                   | RT                 | 183      |                    |                  |                   |                 |
|                                  | Yes                | 144      | 5.7                | <b>0.034</b>     | 9.1               | <b>0.032</b>    |
|                                  | No                 | 39       | 3                  |                  | 5                 |                 |
|                                  | CHT                |          |                    |                  |                   |                 |
|                                  | Yes                | 115      | 7.9                | <b>&lt;0.001</b> | 11.9              | <b>0.003</b>    |
|                                  | No                 | 68       | 2.8                |                  | 4.8               |                 |

*p* values in bold were considered statistically significant

*IDH* mut : *IDH* mutant; *IDH* wt: *IDH* wild-type; RT: radiation therapy; CHT: chemotherapy; PFS: progression-free survival; OS: overall-survival

**Supplementary Table S3. Univariate analysis of adjuvant therapies for PFS and OS in subgroups of WHO grade II and III diffuse gliomas defined by *IDH* and *TERT* promoter mutations**

| <i>IDH/TERT</i> status          | Adjuvant therapies | <i>N</i> | Median PFS (years) | <i>p</i> -value  | Median OS (years) | <i>p</i> -value  |
|---------------------------------|--------------------|----------|--------------------|------------------|-------------------|------------------|
| <i>IDH</i> mut/ <i>TERT</i> mut |                    | 91       |                    |                  |                   |                  |
|                                 | RT                 |          |                    |                  |                   |                  |
|                                 | Yes                | 72       | NR                 | <b>0.020</b>     | NR                | 0.160            |
|                                 | No                 | 20       | 4.8                |                  | 11.3              |                  |
|                                 | CHT                |          |                    |                  |                   |                  |
|                                 | Yes                | 54       | NR                 | <b>0.015</b>     | NR                | 0.219            |
| <i>IDH</i> mut/ <i>TERT</i> wt  |                    | 125      |                    |                  |                   |                  |
|                                 | RT                 |          |                    |                  |                   |                  |
|                                 | Yes                | 107      | 6.3                | <b>0.001</b>     | 11.9              | <b>0.013</b>     |
|                                 | No                 | 18       | 2.9                |                  | 4.7               |                  |
|                                 | CHT                |          |                    |                  |                   |                  |
|                                 | Yes                | 89       | 8.7                | <b>&lt;0.001</b> | 11.9              | <b>0.001</b>     |
| <i>IDH</i> wt/ <i>TERT</i> mut  |                    | 20       |                    |                  |                   |                  |
|                                 | RT                 |          |                    |                  |                   |                  |
|                                 | Yes                | 15       | 0.6                | <b>0.015</b>     | 1.8               | <b>&lt;0.001</b> |
|                                 | No                 | 5        | 0.3                |                  | 0.4               |                  |
|                                 | CHT                |          |                    |                  |                   |                  |
|                                 | Yes                | 11       | 0.9                | <b>0.015</b>     | 2.5               | <b>&lt;0.001</b> |
| <i>IDH</i> wt/ <i>TERT</i> wt   |                    | 58       |                    |                  |                   |                  |
|                                 | RT                 |          |                    |                  |                   |                  |
|                                 | Yes                | 37       | 2.3                | 0.925            | 4.8               | 0.769            |
|                                 | No                 | 21       | 4.7                |                  | 5.0               |                  |
|                                 | CHT                |          |                    |                  |                   |                  |
|                                 | Yes                | 26       | 4.5                | 0.403            | 5                 | 0.578            |
| No                              | 32                 | 2.1      |                    | 3.9              |                   |                  |

*p* values in bold were considered statistically significant

*IDH* mut : *IDH* mutant; *IDH* wt: *IDH* wild-type; *TERT* mut: *TERT* promoter mutant;

*TERT* wt: *TERT* promoter wild-type; RT: radiation therapy; CHT: chemotherapy PFS: progression-free survival; OS: overall-survival; NR: not reached

**Supplementary Table S4. Univariate analysis of different strategies in chemotherapy for PFS and OS in subgroups of WHO grade II and III diffuse gliomas defined by *IDH* and *TERT* promoter mutations**

| <i>IDH/TERT</i> status          | CHT protocol      | <i>N</i> <sup>a</sup> | Median PFS (years) | <i>p</i> -value                                            |
|---------------------------------|-------------------|-----------------------|--------------------|------------------------------------------------------------|
| <i>IDH</i> mut/ <i>TERT</i> mut |                   | 63                    |                    |                                                            |
|                                 | TMZ               | 8                     | NR                 | 0.500 <sup>b</sup> (TMZ vs Alkylating agents)              |
|                                 | Alkylating agents | 19                    | NR                 | 0.130 <sup>b</sup> (TMZ vs No CHT)                         |
|                                 | No CHT            | 36                    | 7.8                | <b>0.007<sup>b</sup></b> (Alkylating agents vs No CHT)     |
| <i>IDH</i> mut/ <i>TERT</i> wt  |                   | 114                   |                    |                                                            |
|                                 | TMZ               | 31                    | NR                 | 0.856 <sup>b</sup> (TMZ vs Alkylating agents)              |
|                                 | Alkylating agents | 49                    | 8.7                | 0.023 <sup>b</sup> (TMZ vs No CHT)                         |
|                                 | No CHT            | 34                    | 2.9                | <b>&lt;0.001<sup>b</sup></b> (Alkylating agents vs No CHT) |
| <i>IDH</i> wt/ <i>TERT</i> mut  |                   | 19                    |                    |                                                            |
|                                 | TMZ               | 6                     | 0.4                | 0.817 <sup>b</sup> (TMZ vs Alkylating agents)              |
|                                 | Alkylating agents | 4                     | 0.6                | 0.141 <sup>b</sup> (TMZ vs No CHT)                         |
|                                 | No CHT            | 9                     | 0.3                | 0.046 <sup>b</sup> (Alkylating agents vs No CHT)           |
| <i>IDH</i> wt/ <i>TERT</i> wt   |                   | 56                    |                    |                                                            |
|                                 | TMZ               | 16                    | 2                  | 0.269 <sup>b</sup> (TMZ vs Alkylating agents)              |
|                                 | Alkylating agents | 8                     | 4.5                | 0.932 <sup>b</sup> (TMZ vs No CHT)                         |
|                                 | No CHT            | 32                    | 2.1                | 0.469 <sup>b</sup> (Alkylating agents vs No CHT)           |

*p* values in bold were considered statistically significant

<sup>a</sup>Those cases with unavailable chemotherapy protocols were excluded

<sup>b</sup>To correct for multiple comparisons, a Bonferroni adjusted *p* value of 0.05/3 (3 = number of times of comparisons) = 0.017 was adopted as the significance threshold
